# Supplementary material for: Real-time location systems technology in the care of older adults with cognitive impairment living in residential care: A scoping review
Source: Front Psychiatry. 2022 Nov 10;13:1038008. doi: 10.3389/fpsyt.2022.1038008 (PMC9685159; doi:10.3389/fpsyt.2022.1038008)
Supplement: Supplementary file 4 [file Table_2.xlsx]

## Sheet: review_150361_20220903051504
Study ID	Covidence #	Author YEAR	Title	Lead author contact details	Country in which the study conducted	Ethics Approval reported?	Study design	Environment	Year(s) that data was collected	Is this study associated with another (location)? Provide Author YEAR	Aim / Objective of study	Type of location tracking technology	How was technology used (select all that apply)?	Measurements used (list)	Thematic purpose of paper (select all that may apply)	Cognitive impairment in majority of Study Participants?	Older Adults >50 years?	Inclusion criteria	Exclusion criteria	Total number of participants (n)	Duration of Monitoring	Type of data collected	Comparisons (ie, movements vs measurements)	Significant findings	Implications (positive / negative)	Limitations	Study funding sources	Possible conflicts of interest for study authors
1	702	Chan 2002	Validation of a remote monitoring system for the elderly: application to mobility measurements	chan@laas.fr.	Other: France	No	Case report	Other: long stay unit of a hospital (pt there x3 years)	not provided	no	validation of a sensor system to assess patient mobility	Infrared - Passive (PIR) or active IR	to measure mobility / transition through spaces (distances walked)	nursing documentation	Validation opportunities	Yes	Yes	not identified	not identified	1	39 days	Subjective (ie, staff documentation / assessments); Objective (ie, techonology data)	nursing documentation to mobility tracking		travel patterns not always detected by nursing staff system could be useful for tracking behaviours or restlessness	one patient - it was a validation study of the system (early publication)	Regional Council of Midi-Pyrenees	none declared
2	3828	Greiner 2007	Feasibility Study of the Integrated Circuit Tag Monitoring System for Dementia Residents in Japan	chieko.nozaki@mcn.ac.jp	Other: Japan	Yes	Cross sectional study	Other: SDU	2005	Makimoto 2006	Test the feasibility of the new monitoring system that uses integrated circuit (IC) tags to monitor the movement patterns of the residents in a psychiatric hospital dementia care unit in Japan	RFID	to measure mobility / transition through spaces (distances walked); to measure levels of activity (how active a person is)	MMSE	Other: level of activity, compare to observation records	Yes	Yes	On SDU in hospital, dementia (MMSE), ability to walk independently	not stated	13	1 week	Subjective (ie, staff documentation / assessments); Objective (ie, techonology data)	data to observation of 1 resident 9-5pm x 7 days, 2 evenings	participant's major movements agreed w observational records. interpretations of behaviours differed, patterns of mobility of one resident	new system - well tolerated, opportunity for objective monitoring	limited number of beacons (not all mvmts detected),	Mitsubishi Foundation	patent for 'movement detection system' (no financial interests)
3	3832	Miyoshi 2008	Association between activity level and changes in bodyweight in dementia patients	rumiko-m@sahs.med.osaka-u.ac.jp	Other: Japan	Yes	Cross sectional study	Other: SDU	2006-2007	Grenier 2007	objective of the present study was to examine the association between the distance walked and changes in bodyweight in PsWD	RFID	to monitor medical status; Other: correlation b/t mobility and weight loss	MMSE, NPI-NH, BMI	Diagnostic accuracy/scoring	Yes	Yes	dx of dementia by neuropsychiatrist, independent ADLs	severe complications affecting bodyweight (edema, ileus), unable to be monitored continuously (isolation)	23	mean 59 days	Objective (ie, techonology data); Other: food diary	weight correlated to distance walked per day / weight change per month	The distance walked and the percentage of hours with movement was examined in relation to rate of weight change. There was a significant negative correlation between median distance walked during the day and the rate of weight change (r=-0.51;P<0.05). Similarly, median distance walked during the night was significantly inversely correlated with rate of weight change (r=-0.47;P<0.05) and was signi…	demonstrates impact of activity level on weight change among dementia patients with an adequate level of ADL. Distance walked per day plays significant role in changes in weight.	small sample size, not sure how they collected dietary intake	Grant-in-Aid for Scientific Research (Japan)	None declared
4	3829	Makimoto 2008	Temporal Patterns of Movements in Institutionalized Elderly With Dementia During 12 Consecutive Days of Observation in Seoul, Korea	kmakimot@sahs.med.osaka-u.ac.jp	Other: Japan	Yes	Cross sectional study	Other: SDU	2006	Greiner 2007	purpose of the present study was (1) to examine the variability of the distance moved per hour and per day and (2) to describe temporal patterns of movements at a long-term dementia care unit	RFID	to measure mobility / transition through spaces (distances walked); to measure levels of activity (how active a person is); Other: describe temporal patterns within the unit	MMSE	Other	Yes	Yes	dx of dementia by neurologist, independent ambulation, on SDU	not provided	8	12	Objective (ie, techonology data)	MMSE and ambulation data	median distance per day was less than 1km	ability to differentia patterns of movement (night / day)	small number of participants (limited IC tags)	grant-in-aid (Scientific Research B)	patent for 'movement detection system"
5	3833	Nakaoka 2010	Pacing and Lapping Movements Among Institutionalized Patients With Dementia	a-nakaoka@cs.kinran.ac.jp	Other: Japan	Yes	Cross sectional study	Other: SDU	2006-2007	Yamakawa 2008, Makimoto 2008, Greiner 2007	quantify ambulation in terms of the distance moved and frequency of various spatial movements among patients with dementia	RFID	to measure mobility / transition through spaces (distances walked); to measure wandering / risk of wandering	MMSE, NPI-NH	Other: repetitive / lapping movements	Yes	Yes	ambulate independently, continuous monitoring x 21 days, median distance at least 500 m	not identified	23	mean 53 days	Objective (ie, techonology data)	distance moved per day / laps vs pacing movements	The cutoff point of_x0002_3 consecutive pacing and lapping movements in this study appears to differentiate routinized pacing movements, regardless of the distance moved per day	spatial movement pat-terns of patients with AD were quite different from those of patients with FTD who routinely paced or lapped most of the distance they moved	small sample size	Grant-in Aid scientific research	none declared
6	3831	Yamakawa, 2008	Environmental control Interventions for frontotemporal dementia with reversed sleep-wake cycles	miyatabu@sahs.med.osaka-u.ac.jp	Other: Japan	Yes	Case report	Other: SDU	2006-2007		use an IC tag monitoring system to evaluate the effect of environmental controls to restore normal sleepâ€“wake cycles in an FTD patient	Other: IC tag	to measure mobility / transition through spaces (distances walked); to measure levels of activity (how active a person is); Other: measure impact of intervention on sleep periods	NPI-NH	Monitoring changes in health status / treatment (post-action)	Yes	Yes	Case study - FTD, reversed sleep-wake cycle	not provided	1	89 days (p 471)	Subjective (ie, staff documentation / assessments); Objective (ie, techonology data)	NPI-NH scores compared among 3 observation periods	environmental control may be effective for FTD patients	According to the staff â€™s evaluation of the subjectâ€™s behavior, the subject tended to resist care during intervention B, but resistance to care decreased in the postintervention period.	case study	grant in Aid for Scientific Research (Scientific Research B, 17406032, 2005-2007) from the Japan Ministry of Education, Culture, Sports, Science, and Technology	none declared
7	770	Yayama 2013	Discrepancy between subjective and objective assessments of wandering behaviours in dementia as measured by the Algase Wandering scale and the Integrated Circuit tag monitoring system	s-yayama@cs.kinran.ac.jp	Other: Japan	Yes	Cross sectional study	Other: SDU in General Hospital in Osaka, Japan	2007	Yamakawa 2012	compare staff administered AWS with temporal / spatial movement indicators from IC monitor	Other: Integrated circuit tag	to measure wandering / risk of wandering; to measure levels of activity (how active a person is)	MMSE and Clinical dementia Rating score - baseline/admission J-AWS (Japan version of the Algase Wandering Scale - Ver 2)	Validation opportunities; Other: Caregiver assessments (J-AWS) compared to actual movement	Yes	Yes	dementia diagnosis ability to walk independently 3 consecutive days of IC monitoring prior to J-AWS evaluation J-AWS evaluation	Not stated	30	median duration 7 days (range 3 - 14 days, IQR 5 days)	Subjective (ie, staff documentation / assessments); Objective (ie, techonology data)	J-AWS compared to IC tag data	median distance moved per day differed significantly amongst the four wandering statuses median distanced moved during four daily periods differed significantly in the morning and afternoon - higher rate of wandering associated with longer distance moved per period poor agreement on temporal movements between J-AWS evaluation and IC measurements during non-day shift hours (ie nights)	Nurse evaluations of wandering was in agreement with distance moved as measured by IC tag Staff assessment alone insufficient for evaluation of wandering behaviours Association between JAWS subscales and MMSE was in agreement	small sample size only one institution	Grant-in-aid for Scientific Research (Japan's Ministry of Education, Culture, Sports, Science and Technology).	Nil declared
8	758	Yamakawa 2012	Comparing dementia patients' nighttime objective movement indicators with staff observations	miyatabu@sahs.med.osaka-u.ac.jp	Other: Japan	No	Cross sectional study	Other: SDU of a general hospital in Osaka, Japan	Sep 2008 - Apr 2009	Yayama 2013 (SDU in General Hosp, Osaka Japan)	i) describe patient movements at night ii) compare nursing records against objective measurement iii) examine strengths and weaknesses of monitoring compared to nursing documentation	Other: IC tag	to measure levels of activity (how active a person is)	NPI-NH - NPI nursing home version MMSE	Validation opportunities	Yes	Yes	dementia, independent mobility	nil	35	Sept 2008 - Apr 2009	Subjective (ie, staff documentation / assessments); Objective (ie, techonology data)	nursing documentation of patient night-time activity compared to IC monitoring data	patients moved during 40% of nights monitored, mean distance of 36m per hour. 39% agreement between movement and nursing records scales to measure sleep issues / night wandering do not correspond well with real-time measurement of movement at night	staff tend to document patient's status when it exceeds their expectations staff report that system may be of use for monitoring patients at risk of falling at night	one site	Research Grant for Research on Dementia from Ministry of Health, Labour, and Welfare of Japan Grant in Aid for Scientific Research from Japan's Ministry of Education, Culture, Sports, Science and Technology	Patent for 'movement detection system' by Dr. Makimoto, but no financial interest
9	3838	Liao 2012	Changes in activity patterns after the oral administration of brotizolam in institutionalized elderly patients with dementia	kmakimot@sahs.med.osaka-u.ac.jp	Other: Japan	Yes	Other: Retrospective	Other: SDU	Sept 2008- Sept 2009	Nakaoka 2010	We monitored and analyzed the consecutive distance moved by institutionalized elderly patients with dementia over 24 h	RFID	to monitor medical status; Other: mobility after brotizolam administration	MMSE, med administration date	Monitoring changes in health status / treatment (post-action)	Yes	Yes	dx of dementia, identified as a wanderer by hospital staff, dose of brotizolam taken during study period	inability for continuous monitoring (isolation) or other reasons	7	7 days	Subjective (ie, staff documentation / assessments)	activity monitoring to administration of Rx	highly significant increase in in the incidence of reversed rest-activity patterns after a single dose of brotizolam. Night-time movements were recorded in all patients, and a sharp increase in the distance moved during 10 most active hours was recorded by the monitoring system in one patient (R30).	significant increase in the reversed rest-activity pattern occurred, which was expressed as a reversal of Ld-5 (least active 5h) and Md-10 (most active 10) onset time during the post-administration period	lack of systematic measurement of the medicationâ€™s side effects.	Grant-in-Aid for Scientific Research Program	none declared
10	744	Kearns 2010	Tortuosity in movement paths is related to cognitive impairment	kearns@fmhi.usf.edu	United States	Yes	Cross sectional study	Other: assisted living facility (help with ADLs but no nursing)	not provided	Kearns 2012	to determine if Fractal D is correlated to cognitive function (MMSE)	Ultrawide Band	to measure cognition	MMSE Revised Algase Wandering Scale - Community Version [RAWS-CV]	Diagnostic accuracy/scoring	Yes	Yes	not given	not given	14	30 days	Objective (ie, techonology data); Other: MMSE	Fractal D to MMSE Fractal D to RAWS-CV	statistically significant - more variable walking paths predict lower MMSE scores Fractal D scores correspond to subjective wandering measurements	Fractal D sensitive to cognitive function	small sample size	Johnnie B Byrd, Sr Alzheimer's Research Centre and Research Institute	nil declared
11	3827	Kearns 2011	Wireless telesurveillance system for detecting dementia	kearns@usf.edu	United States	Yes	Cross sectional study	Long term care	not provided	site 1 same participants as Kearns '10, but there is a site 2 in this study	determine correlations between movement speed and path length to dementia	Ultrawide Band	to measure mobility / transition through spaces (distances walked); Other: correlations between speed, path to dementia	MMSE Revised Algase Wandering Scale (RAWS-CV)	Validation opportunities; Other: correlation between Fractal D scores and dementia	Yes	Yes	living in ALF, capable of independent movement (with or without aids)	serious mental health disorders (e.g. developmental delays, schizophrenia, bipolar disorders)	25 (14 w dementia)	30 days	Subjective (ie, staff documentation / assessments); Objective (ie, techonology data)	MMSE to Fractal D RAWS-CV to Fractal D	Fractal D significant predictor of dementia - odds of dementia increased 30% with each unit of increase in Fractal D score Neither MMSE nor Fractal D reliably differed for persons identified as wanderers MMSE - misclassified is greatest for values from 19-21	Fractal D predicts a diagnosis of dementia MMSE significant predictor of dementia Average rate of travel and mean path length significantly correlates with dx of dementia	lack of info on severity of dementia, type, and duration	Johnnie B. Byrd Alzheimer's Research Centre & Research Institute	none declared
12	3801	Grunerbl 2011	Using indoor location to assess the state of dementia patients: results and experience report from a long term, real world study	agnes.grunerbl@uni-passau.de	Other: Vienna, Austria	No	Cross sectional study	Long term care	not stated	n/a	describe integration of UWB technology into NH	Ultrawide Band	to measure social engagement; to measure mobility / transition through spaces (distances walked); to measure levels of activity (how active a person is)	BPSD narratives by nursing staff	Diagnostic accuracy/scoring; Validation opportunities	Yes	Yes	any resident within the home who was agreeable to wearing the tag	not given	6	n=3 for 8-10 mos, n=3 for 5-6 mos	Subjective (ie, staff documentation / assessments); Objective (ie, techonology data)	BPSD (positive (eg sociable) and negative (eg fearful)) compared to movement	location is able to recognize positive or negative resident states (trends). accuracy better over longer period of time (14 days) if a persons 'state' fluctuated daily - classification is not as accurate	location data can be used to support assessment of a patients' state over a longer term	small sample size (6), limited by narratives	BMASK (Austrian Federal Ministry of Labour, Social Affairs and Consumer Protection)	nil declared
13	764	Kearns 2012	Path tortuosity in everyday movements of elderly persons increases fall prediction beyond knowledge of fall history, medication use, and standardized gait and balance assessments	kearns@usf.edu	United States	Yes	Cross sectional study	Other: Assisted Living Facility (assistance with ADL but no nursing [pg e8]	not provided	Kearns 2010	relationship of falls to movement path variability	Ultrawide Band	to measure mobility / transition through spaces (distances walked); Other: fractal D - path tortuosity	Standard gait and balance assessmnts included - Timed up and go, timed 180 turn test, gait velocity (dual task walking test). Those with cog impairment were not tested MMSE ADL assessments medications / dx of dementia (ALF records)	Other: fall prediction	Yes	Yes	not identified	inability to rise unassisted require a walking aid	69 included in analysis, however 49 completed 365 days of monitoring	365	Subjective (ie, staff documentation / assessments); Objective (ie, techonology data); Other: medication, MMSE, ADLs	fractal d, fall history, and psychoactive medications ADLs, dementia dx, MMSE fractal d to standard gait measurements	odds of falling increased 2.548 for every 0.1 increase in fractal d fall in prior year increased odds by 7.36 Neither the first week of fractal d nor the measure 2 weeks before the fall was reliably associated with the fall no significant association of number of psychoactive medications and elevated falls risk	fractal d is an independent predictor of future falls after past fall hx taken into account fractal d is inversely related to MMSE geographic orientation scores	For frail elders for whom gait and balance tests are too difficult, fractal D maybe an appropriate predictor of future falls in assisted living facilities	Agency for healthcare research and quality	nil declared
14	3830	Bowen, 2012	Multidrug-resistant organisms in a community living facility: Tracking patient interactions and time spent in common areas	mary.bowen2@va.gov	United States	Yes	Cross sectional study	Other: Veterans/LTC	not reported	no	use a real-time surveillance system to determine the amount of time MRSA- and VRE-positive patients spend outside of their room in common areas interacting with other patients	Ultrawide Band	to measure mobility / transition through spaces (distances walked); Other: measure interactions with other residents	MRSA / VRE status	Other: social interactions with other residents that are VRO negative	Yes	Yes	not provided	not provided	8	3 weeks	Objective (ie, techonology data); Other: interviews with staff	social interactions b/t positive and neg residents	positive residents interacted with each other regularly, coming into contact with common objects	required increased vigilance and awareness of resident interactions	staff can also transmit - excluded, unable to determine nature of each interaction	not identified	none declared
15	2793	Boekhorst 2012	Quality of life of nursing home residents with dementia subject to surveillance technology versus physical restraints: an explorative study	s.teboekhorst@vivium.nl	Other: Netherlands	Yes	Other: longitudinal (3 measurements / 2 month intervals)	Long term care	not provided	no	explore social, mood, and behavioural dimensions (QoL) of those with surveillance tech compared to those with physical restraints	Other: three homes used tech - not all the same (cameras, inactivity sensors, bed sensors, GPS chips)	Other: use of physical restraints with and without technology	QUALIDEM NPI Barthel Index Global Deterioration Scale (dementia severity)	Other: measure quality of life	Yes	Yes	"subjected to one or more forms of surveillance or one or more forms of physical restraints"	not identified	221	3 measurements of 2 months each	Subjective (ie, staff documentation / assessments); Objective (ie, techonology data)	restraints vs surveillance groups compared with GDS, Barthel, RAI mood, RAI behaviour and NPI	tech was predominantly used in residents with medium ADL dependency while physical restraints predominantly used in residents with high ADL dependency residents with surveillance tech were in a less advanced stage of dementia, and more independence in ADLs	intro of surveillance tech did not have a significant effect on use of restraints QoL unrelated to use of technology	physical restraints prevalence was low - 5.4% compared to historical data	ZonMw grant	none declared
16	3496	Bowen 2016	Intra-individual changes in ambulation associated with falls in a population of vulnerable older adults in long-term care	mbowen@wcupa.edu	United States	Yes	Other: longitudinal	Long term care	not provided	Bowen 2018	examine how intra-individual changes in ambulation may be used to predict falls in a LTC setting	Ultrawide Band	to measure mobility / transition through spaces (distances walked); Other: describe ambulation characteristics (and changes) to predict fall	MOCA Barthel index (functional status)	Monitoring changes in health status / treatment (post-action)	Yes	Yes	ambulary (with or without gait aid), >50 y of age	acute event in prev 30 days or dx of TBI within 1 yr of enrolment	26	at least 4 weeks (avg = 16 wk participation)	Subjective (ie, staff documentation / assessments); Objective (ie, techonology data)	CI and time spent walking, walking distance, and distance covered in a path	increased time walking, decreased walking distance, and increased distance in path associated with significantly higher odds of falling higher MOCA associated with reduced odds of fall when MOCA score removed - increased time walking, decreased distance, and increased path distance still associated with higher odds of fall those ambulating more than 1.36 miles or more per week in continuous paths…	fall events occur during times when ambulation has fundamentally changed more ambulation is not always better - change in walking pattern indicative of impending fall	- limited number of falls, - no falls with mild/mod CI - all data from one LTC facility - limited sample size	Rehabilitation Research and Development Career Award - Department of Veterans Affairs (CDA E7503W)	Nil declared
17	3817	Kumar 2017	Trend analysis in the trajectory of the dementia patients	ashish007@e.ntu.edu.sg	United States	Yes	Cross sectional study	Long term care	not identified (archived data set!)	Kearns '10, Kearns '11, Kearns '12	identify features of significance in trajectory of dementia patients	Ultrawide Band	to measure mobility / transition through spaces (distances walked); Other: patient trajectories	MMSE	Diagnostic accuracy/scoring	Yes	Yes	not identified	not identified	10	1 year	Objective (ie, techonology data)	trajectories to MMSE	change in trends (over the year) in angle turn and path efficiency in those with lower MMSE scores trends in ambulation fraction and average speed was not significant	worsening dementia will likely evidence increasing angle turn and decreasing path efficiency over longer times	small sample size	National Research Foundation, Singapore	none declared
18	3794	Jansen 2017	Life-space and movement behaviour in nursing home residents: results of a new sensor-based assessment and associated factors	carl-philipp.jansen@psychologie.uni-heidelberg.de	Other: Germany	Yes	Cross sectional study	Long term care	not provided	Jensen 2014 (not included in this review - based on data from the Long-term care in motion study)	describe the residents' life space and movement behaviours within the home	Other: RSSI - p 3	to measure mobility / transition through spaces (distances walked); Other: measurement of life-space (Webber framework)	MMSE GDS Apathy evaluation scale (AES-D) Short - Falls efficacy scale environmental factors (time away from private room and transits (to meal)) LS measurements (zones 1-4)	Other: measurement of movement about life-space	Yes	Yes	"all residents eligible for participation"	terminally ill or receiving palliative care	65 (only 22 could wear at a time)	2 consecutive days for each participant, 10am to 6pm ONLY	Subjective (ie, staff documentation / assessments); Objective (ie, techonology data); Other: room measurements, meal and transit times (represent 2.7h daily)	time out of room (TAFR) and gait speed, cog status, and depression score	higher gait speed, lower cognitive status, and lower depressive symptoms significantly associated with more time away from private room. falls efficacy scores did not contribute to overall variance explanation in model life space was very limited - majority of time was in meal times/transit males had larger life space mobility	strong association between institutional factors and one's life space Residents generally inactive between meals - call for increased daily activities	daytime hours only (10 am to 6 pm); two consecutive days of wear lack of other research for comparison lower cog - staff may have kept residents 'in sight' for longer periods than others	European Commission	none declared
19	3791	Vahia 2020	Radio signal sensing and signal processing to monitor behavioral symptoms in dementia: a case study	ivahia@partners.org	United States	Yes	Case report	Long term care	2017	n/a	proof of concept - feasibility study	RFID	to measure levels of activity (how active a person is)	nursing documentation	Influence decision making processes/ change in care plan	Yes	Yes	not provided (case of 1 person)	not described	1	70 days	Subjective (ie, staff documentation / assessments); Objective (ie, techonology data)	nursing documentation was compared to mobility data	- inconsistent documentation of patient behaviour - not able to use documentation to compare to technology data - 13.7% in movement on family visit days compared to day prior and 29.9% increase compared to the subsequent day (visit days are a trigger for increased movement).	data can be used to describe behaviours beyond nursing documentation potential for data to be used to preempt intervention	case of 1	Innovations grant from Massachusetts Institute of Technology	nil declared
20	833	Bowen 2018	Balance ability and cognitive impairment influence sustained walking in an assisted living facility	mebowen@udel.edu	United States	Yes	Other: longitudinal	Long term care	not provided	Bowen 2016	determine the influence of CI, gait quality, and balance ability on walking distance and speed	Ultrawide Band	to measure mobility / transition through spaces (distances walked); Other: influence of CI on gait speed, quality, and walking distance	MOCA Tinetti Gait & Balance Test	Diagnostic accuracy/scoring; Validation opportunities	Yes	Yes	ambulatory (with or without aid), living in residential facility	acute health event in prev 30 days or dx of TBI within 1 yr of study enrolment	26	avg 14 weeks (SD 8.44 weeks), n=14 had 25 weeks	Subjective (ie, staff documentation / assessments); Objective (ie, techonology data)	CI and movement	CI associated with increased walking distance compared to no CI, each 1 point increase on balance ability associated with 8% increase in sustained walking distance (metres) mild mod and severe CI associated with slower sustained gait speed; each 1 point increase associated with 4% increase in speed (m/s)	CI associated with longer but slower sustained walking sustained gait speed was markedly lower in those with severe CI ... sustained gait speed may be biomarker for progression of cognitive decline	- small sample size (yet 555 observations) - co-morbidities may affect gait, balance and walking activity	Career Development Award from VA Rehabilitation Research and Development Office (E7503W).	Nil declared.
21	3803	Okada 2019	Dementia Scale Classification Based on Ubiquitous Daily Activity and Interaction Sensing	okada-s@jaist.ac.jp	Other: Japan	Yes	Cross sectional study	Other: 2 residential nursing facilities	not provided	n/a	Integrate different approaches to predict a high/low score on dementia scale	Bluetooth	to measure cognition	HDS-R (Revised Hasegawa's dementia scale) "similar to MMSE"	Diagnostic accuracy/scoring	Yes	Yes	not provided	not provided	19	3 mos	Objective (ie, techonology data)	activity data compared to HDS-R robot interaction features / speaking length to HDS-R	machine learning to predict HDS-R score - accuracy with activity is 0.665 - lower than robot interaction features, it is effective for use in classification of HDS score	ability of both technologies to accurately identify HDS (cognition) score	small sample size did not use dx from staff - was not clarified if model works	none declared	none declared
22	3615	Bowen 2019	Wandering behaviours and activities of daily living among older adults with cognitive impairment	mebowen@udel.edu	United States	Yes	Other: longitudinal	Long term care	not provided	Bowen 2016 (same facility)	characteristics of wandering that are associated with ADL function	Ultrawide Band	to measure wandering / risk of wandering; Other: Association b/t wandering and ADL function	Barthel index motor items of FIM MOCA	Diagnostic accuracy/scoring; Other: factors associated with wandering	Yes	Yes	ambulatory (with or without assistive device) living within the NH	acute health event (eg stroke) in past 30 days or dx of traumatic brain injury within 1 yr of study enrolment	22	8 months	Subjective (ie, staff documentation / assessments); Objective (ie, techonology data)	mild CI - positive correlation between the Barthel index and gait speed, but no correlation to number of wandering episodes or distance travelled FIM - small to moderate positive associations with wandering episodes and distance travelled but not gait speed	distance travelled had low sensitivity and specificity to ADL performance on Barthel (0.62); distance travelled had good sensitivity (0.77) and fair specificity (0.67) to ADL performance on FIM wandering episodes had good sensitivity (0.74) and specificity (0.70) to ADL performance on FIM	more wandering episodes are associated with an increased ability to perform ADL, whereas increased wandering distance associated with reduced ability to perform ADL	small sample (one NH) medical conditions which may have affected gait, balance and ADL ability	VA Rehabilitation Research and Development Office - Career Development Award	nil declared
23	3802	Yang 2020	The role of bedroom privacy in social interaction among elderly residents in nursing homes: an exploratory case study of Hong Kong	newman.lau@polyu.edu.hk	Other: Hong Kong	No	Cross sectional study	Other: nursing home	not provided	n/a	mobility patterns - how does bedroom privacy reflect these patterns social behaviour patterns - how associated with bedroom privacy	RFID	to measure social engagement; to measure mobility / transition through spaces (distances walked)	shared room typologies (TESS-NH, SCEAM, EAT) geometrical indicators (shared floor space per resident)	Influence decision making processes/ change in care plan; Other: role of bedroom privacy on mobility	Unidentified	Not given	relatively more independent capable of moving around nursing home carry out activities of daily living	not provided	50	1 month	Objective (ie, techonology data)	assumption that presence in a 'friend's' room was indication of meaningful social interaction	those in 3 & 5 bedrooms stayed for avg 10h in room, which is 3-5 hours more than 4 bedroom residents, less time in social spaces privacy does not have clear effect on visiting friends rooms 3 bedroom residents had highest probabilty of being in social spaces	Privacy levels affect resident time spent in room and social spaces those in 3 bed rooms were least active -spent most time in bedroom	No patient demographics provided (unclear as to dementia or not) assumption that presence in a 'friend's' room was indication of meaningful social interaction	"received no external funding"	no conflicts declared
24	3428	Bellini 2021	Understanding social behaviour in a health-care facility from localization data: a case study.	sara.comai@polimi.it	Other: Italy	No	Case control study	Other: Alzheimers disease assisted care home (village)	Jan 2020 to July 2020	Il Paese Ritrovato (no others included in this review) (Masciadri 2019)	Analyze location data, build tools for comprehension of socialization data (Community Behaviour Prediction Table) (build on Alzheimer's garden study)	Bluetooth	to measure social engagement; to measure levels of activity (how active a person is)	community relational index popularity index	Other: description of social behaviours, prediction of use of space	Yes	Not given	not provided	not provided	64	months (Feb to Nov 2019) for Popularity index Jan to July 2020 for community relational index (COVID)	Objective (ie, techonology data)	nil	Relational index - estimates relation between two individuals, yet does not consider meaning of interaction (not measurable) Community relational index - sociability of all dwellers Popularity index - measure of the attendance of a place Community RI and PI - able to provide caregivers with predictions of populated areas for the upcoming week (enables staff scheduling)	Development of Community behaviour Prediction Table (CBPT) outline social profile of residents identify relationships among dwellers describe sociability of the community Determine levels of social distancing measures for COVID-19	not discussed	Alta Scuola Politecnica	Author Giovanni Ingrao has been involved as a consultant in CompanyMeridana. Giovanni Ingrao has done the architectural design of â€œPaese ritrovatoâ€
25	3793	Bowen 2021	Changes in motor behavior predict falls and identify acute events	mebowen@udel.edu	United States	Yes	Other: longitudinal	Long term care	not identified	different facility from other Bowen papers	Examine how changes in motor behavior (using RTLS) may be an early indicator of a fall, delirium, and/or UTI	Ultrawide Band	to measure levels of activity (how active a person is); Other: changes in mobility to predict falls / UTI	CAM (confusion assessment method) RAS (richmond agitation sedation scale)	Diagnostic accuracy/scoring	Yes	Yes	dx of CI/dementia, ambulatory at study start or able to propel self in w/c	acute health event 30 days prior or TBI within 1 yr of enrolment	23 (tables = 23, yet in discussion states 22), ALL MALE (veterans)	18 mos	Subjective (ie, staff documentation / assessments); Objective (ie, techonology data)		on average - residents with delirium walked 543.9m farther and spent 2108s more time walking when compared to sample .. those w delirium also covered more distance in path (566m), more time walking in a path (1919s), and increased paths (33 v 23) when compared to sample decreased gait speed associated with a fall predictors of delirium - increased dist travelled (OR 1.01), and decreased time trav…			Rehabilitation Research and Development office at the Department of Veterans Affairs [grant number E7503W and I01RX002413].	Nil declared
26	Au-Yeung 2021	Au-Yeung 2021	Monitoring Behaviors of Patients With Late-Stage Dementia Using Passive Environmental Sensing Approaches: A Case Series	auyeungm@ohsu.edu	United States	Yes	Case series	Long term care	not identified	no	Case series evidence of the feasibility of using motion sensor technologies to provide objective behavioral markers of four PwD with varying behavioral characteristics and how they can be helpful in guiding the treatment of the participants	Infrared - Passive (PIR) or active IR	to measure agitation; to measure mobility / transition through spaces (distances walked); to measure levels of activity (how active a person is)	Cohen Mansfield Agitation	Diagnostic accuracy/scoring; Monitoring changes in health status / treatment (post-action); Validation opportunities	Yes	Yes	Persons with dementia >50 on Cohen Mansfield Agitation Inventory		4	not stated	Objective (ie, techonology data); Other: PIR data (Case 1) Emerald device (Case 3 & 4)	PIR data compared to Emfit bed pressure mat (sleep score /agitation)	Case 1 - sleep score significantly lower on agitated nights, participant was out of living space more often on agitated nights Case 3 - increased couch time associated with worsening cognitive status, initiation of Rx changes Case 4 - movements diagnosed episodic movements of lower limbs, decrease in risperidone (resolved mvmts)	potential of technology used to facilitate detection of agitation and potential for intervention	Not all cases used same technology:	McLean Technology in Aging Lab; National Institute on Aging (NIA) grants	Dr. Kabelac receives fees from Emerald Innovations, Dr. Katabi has a patent Mtion trackign
27	3840	Zhang 2021	Contactless in-home monitoring of the long-term respiratory and behavioural phenotypes in older adults with COVID-19: A case series	ivahia@mclean.harvard.edu	United States	Yes	Case series	Long term care	2020		We present the results of 24/7 monitoring of three COVID-19 patients in an assisted living facility for 3 months (recovery trajectory)	Other: Emerald	to measure mobility / transition through spaces (distances walked); to measure levels of activity (how active a person is); to monitor medical status; Other: Sleep efficiency (total sleep to total time in bed)	none used	Monitoring changes in health status / treatment (post-action)	Yes	Yes	COVID 19	not described	3	Total of 327 days (Subj 1 - 106 days, Sub 2 - 115 days, Sub 3 - 106 days)	Objective (ie, techonology data)	Sleep efficiency (time in bed / time sleep), gait speed, activity (general behaviour patterns)	all subjects exhibited signs of sleep issues that persisted for a long time activity graphs revealed that although all subjects live in same ALF with same routines, subject routines vary (could be secondary to underlying CI).	ability to objectively quantify a subject's behaviour and changes in habits.	small sample size	MIT J-Clinic for Machine Learning in Health	IV was supported by the McLean Division for Geriatric Psychiatry
